# Supplementary material for: Microscale magnetic field modulation using rapidly patterned soft magnetic microstructures
Source: Royal Society of Chemistry journal article supplement (doi:10.1039/d1ra06173a), 2021-01-01
Supplement: d1ra06173a1.pdf [file d1ra06173a1.pdf]

# Electronic Supplementary Information for

## **Microscale magnetic field modulation using ultra-rapidly fabricated soft magnetic patterns**

*Fengshan Shen, Yan Yu, Yuexuan Li, Hongtao Feng, Tianzhun Wu and Yan Chen\**

CAS Key Laboratory of Health Informatics, Shenzhen Institutes of Advanced Technology,  
Chinese Academy of Sciences, Shenzhen, China

**\*Corresponding author: Yan Chen**

E-mail: yan.chen@siat.ac.cn

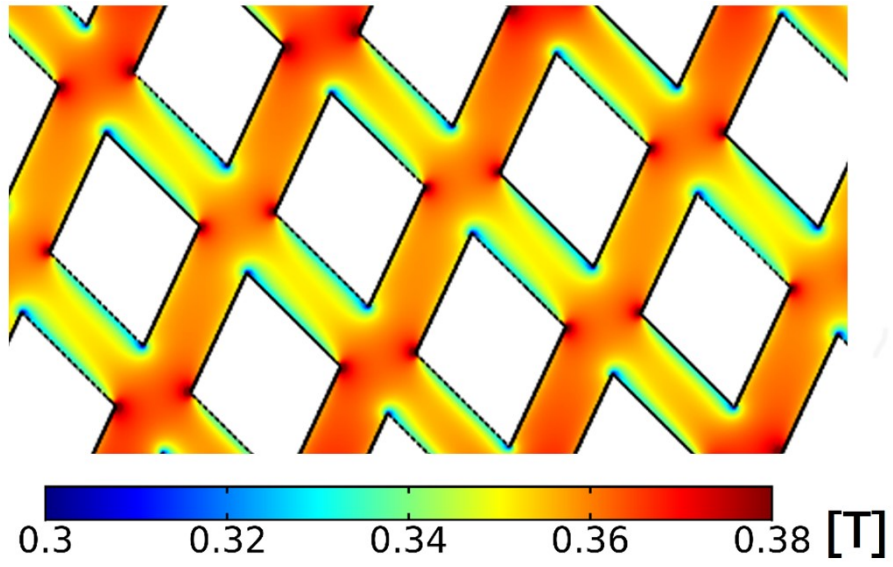

**Fig. S1.** Numerical simulation of the magnetic field distribution in the grid-like pattern. There is discrepancy in the distribution of the magnetic field in bar areas with different angles.
